# Supplementary material
Source: MDPI journal article supplement (https://www.mdpi.com/2311-5637/9/9/780)
Supplement: s1 [file s1]

**Supplementary File S2 (Figures S1 and S2):**

**Figure S1:**

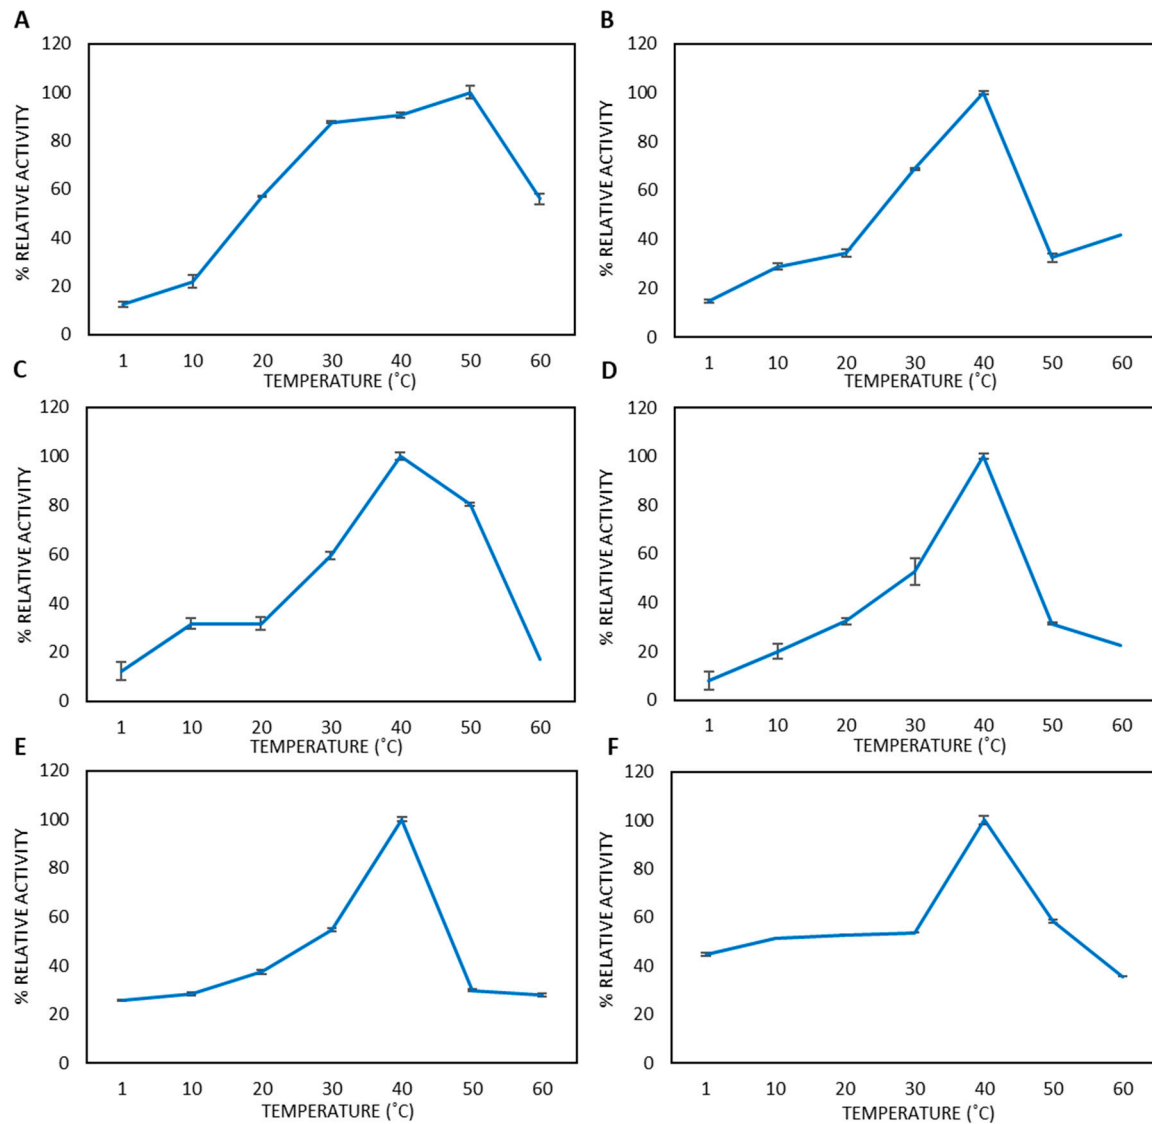

**Figure S1:** Effect of temperature on xylanase activity in secretomes from (A) *E. maritima* strain SFI-F16, (B) *E. maritima* strain SFI-D6 (C) *P. chrysogenum* strain SFI-D13, (D) *P. chrysogenum* strain BBW2, (E) *P. antarcticum* strain SFI-F25, and (F) *T. stollia* strain SFI-F17 relative to activity at the optimum reaction temperature, using rye arabinoxylan as substrate in reactions at 1, 10, 20, 30, 40 50 and 60°C and pH 5.0. Samples tested were harvested at their respective highest xylanase production peaks during LSF on WB at 25°C and 180 rpm orbital shaking speed. Error bars represent standard deviation of measurements from duplicate flasks.

**Figure S2:**

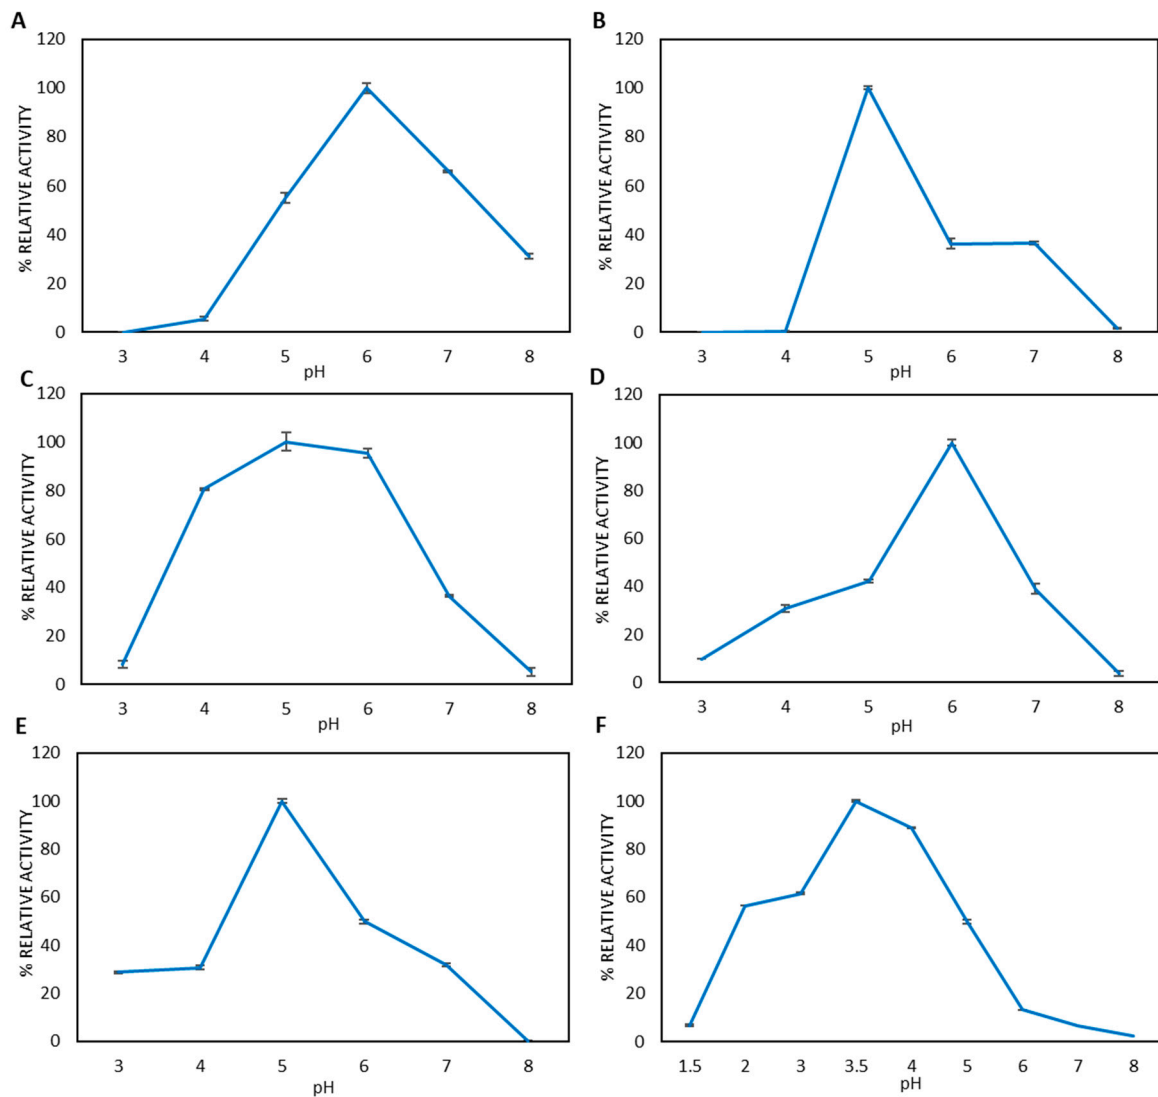

**Figure S2:** Effect of pH on crude xylanase from (A) *E. maritima* strain SFI-F16, (B) *E. maritima* strain SFI-D6 (C) *P. chrysogenum* strain SFI-D13, (D) *P. chrysogenum* strain BBW2, (E) *P. antarcticum* strain SFI-F25, and (F) *T. stollii* strain SFI-F17, relative to the respective optima, using rye arabinoxylan as assay substrate in reactions at 50 C and pH 3.0, 4.0, 5.0, 6.0, 7.0 and 8.0. For *T. stollii* (F), % relative activity was also reported at pH values of 1.5, 2.0 and 3.5. Samples tested were harvested at their respective highest xylanase production peaks during LSF on WB at 25°C and an orbital shaking speed of 180 rpm. Error bars represent standard deviation of measurements from duplicate flasks.
