# Supplementary material
Source: MDPI journal article supplement (https://www.mdpi.com/2311-5637/9/9/780)

Supplementary File S3: Original gel images with corresponding main text Figure numbers.

Figure S3

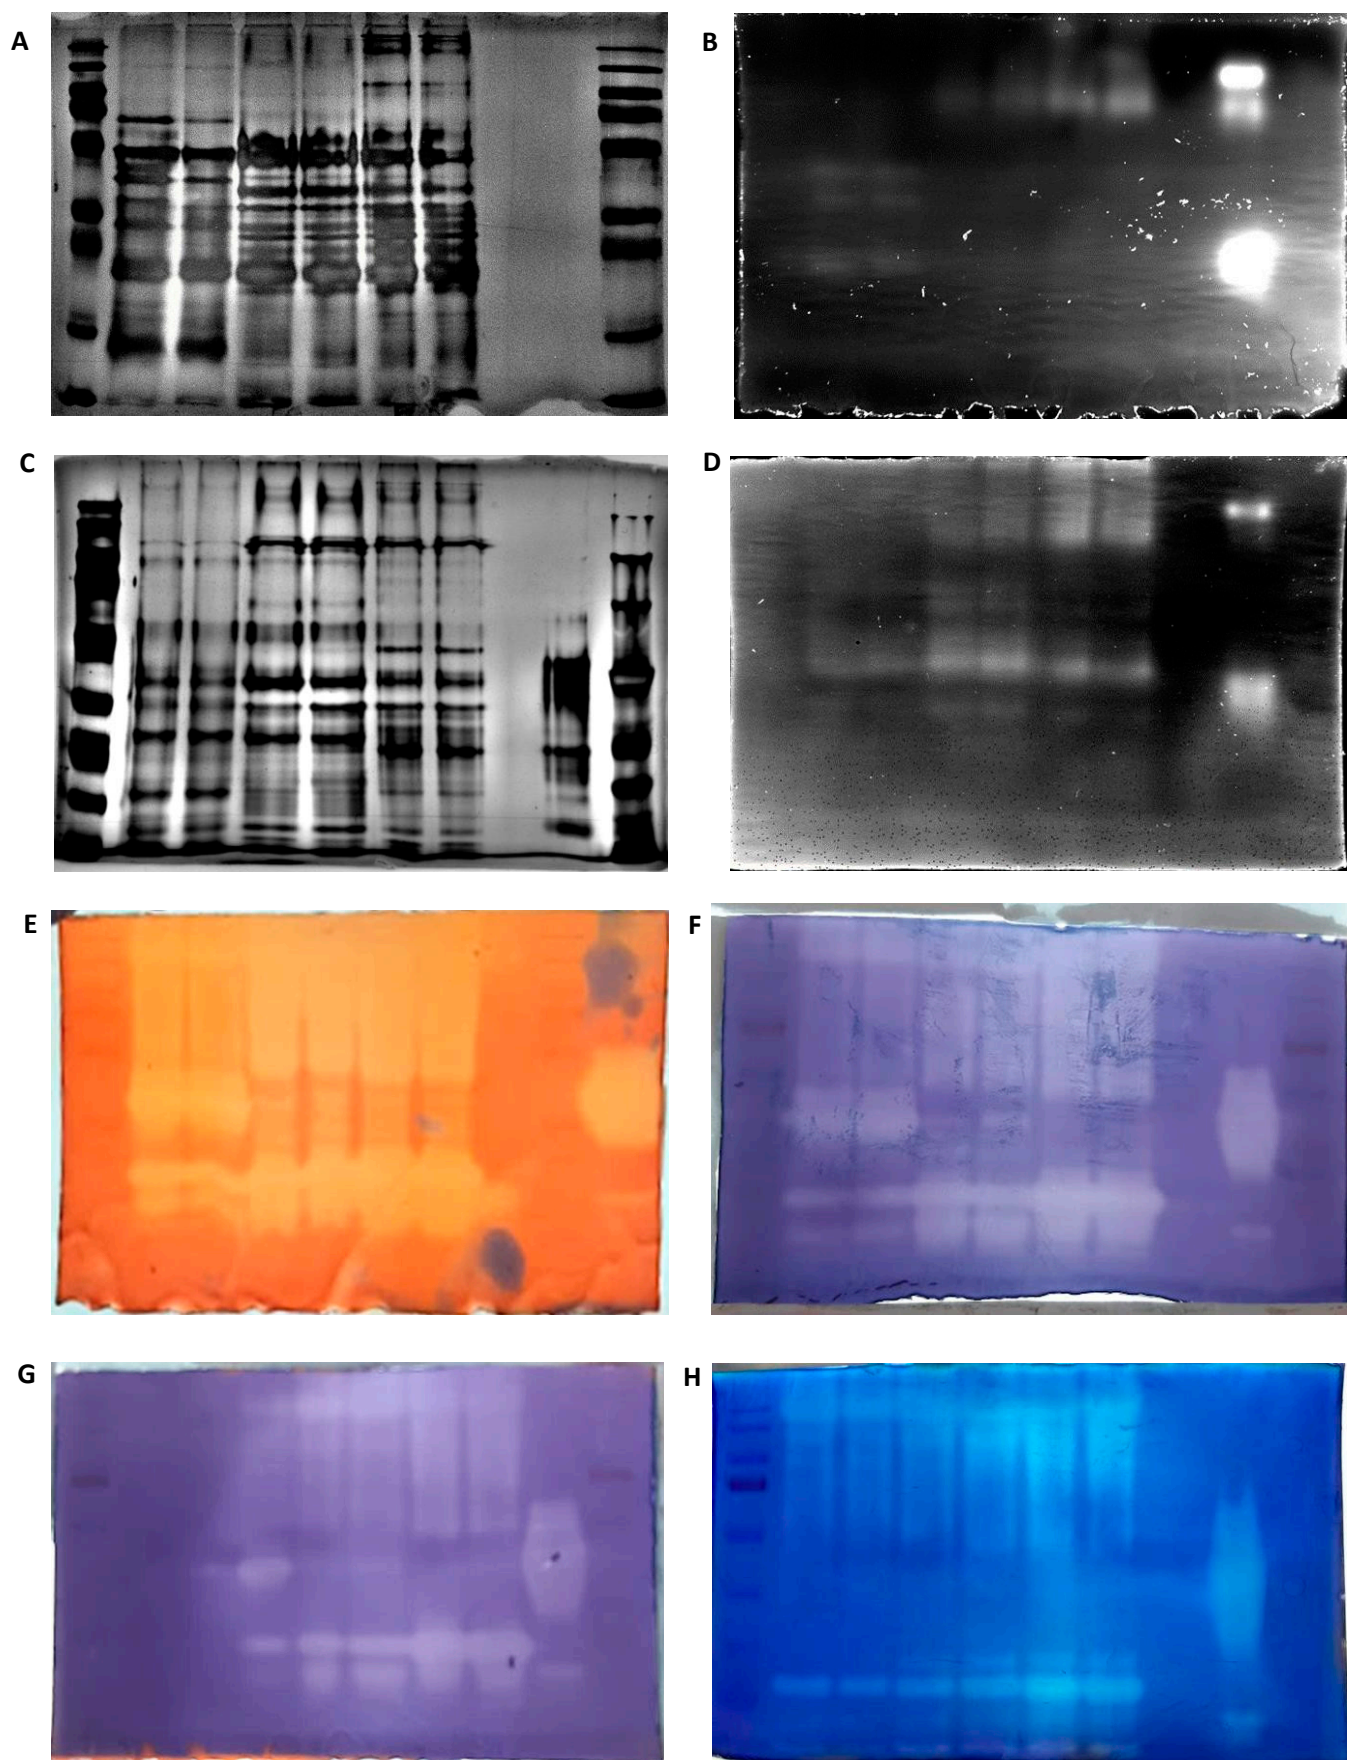

Figure S4:

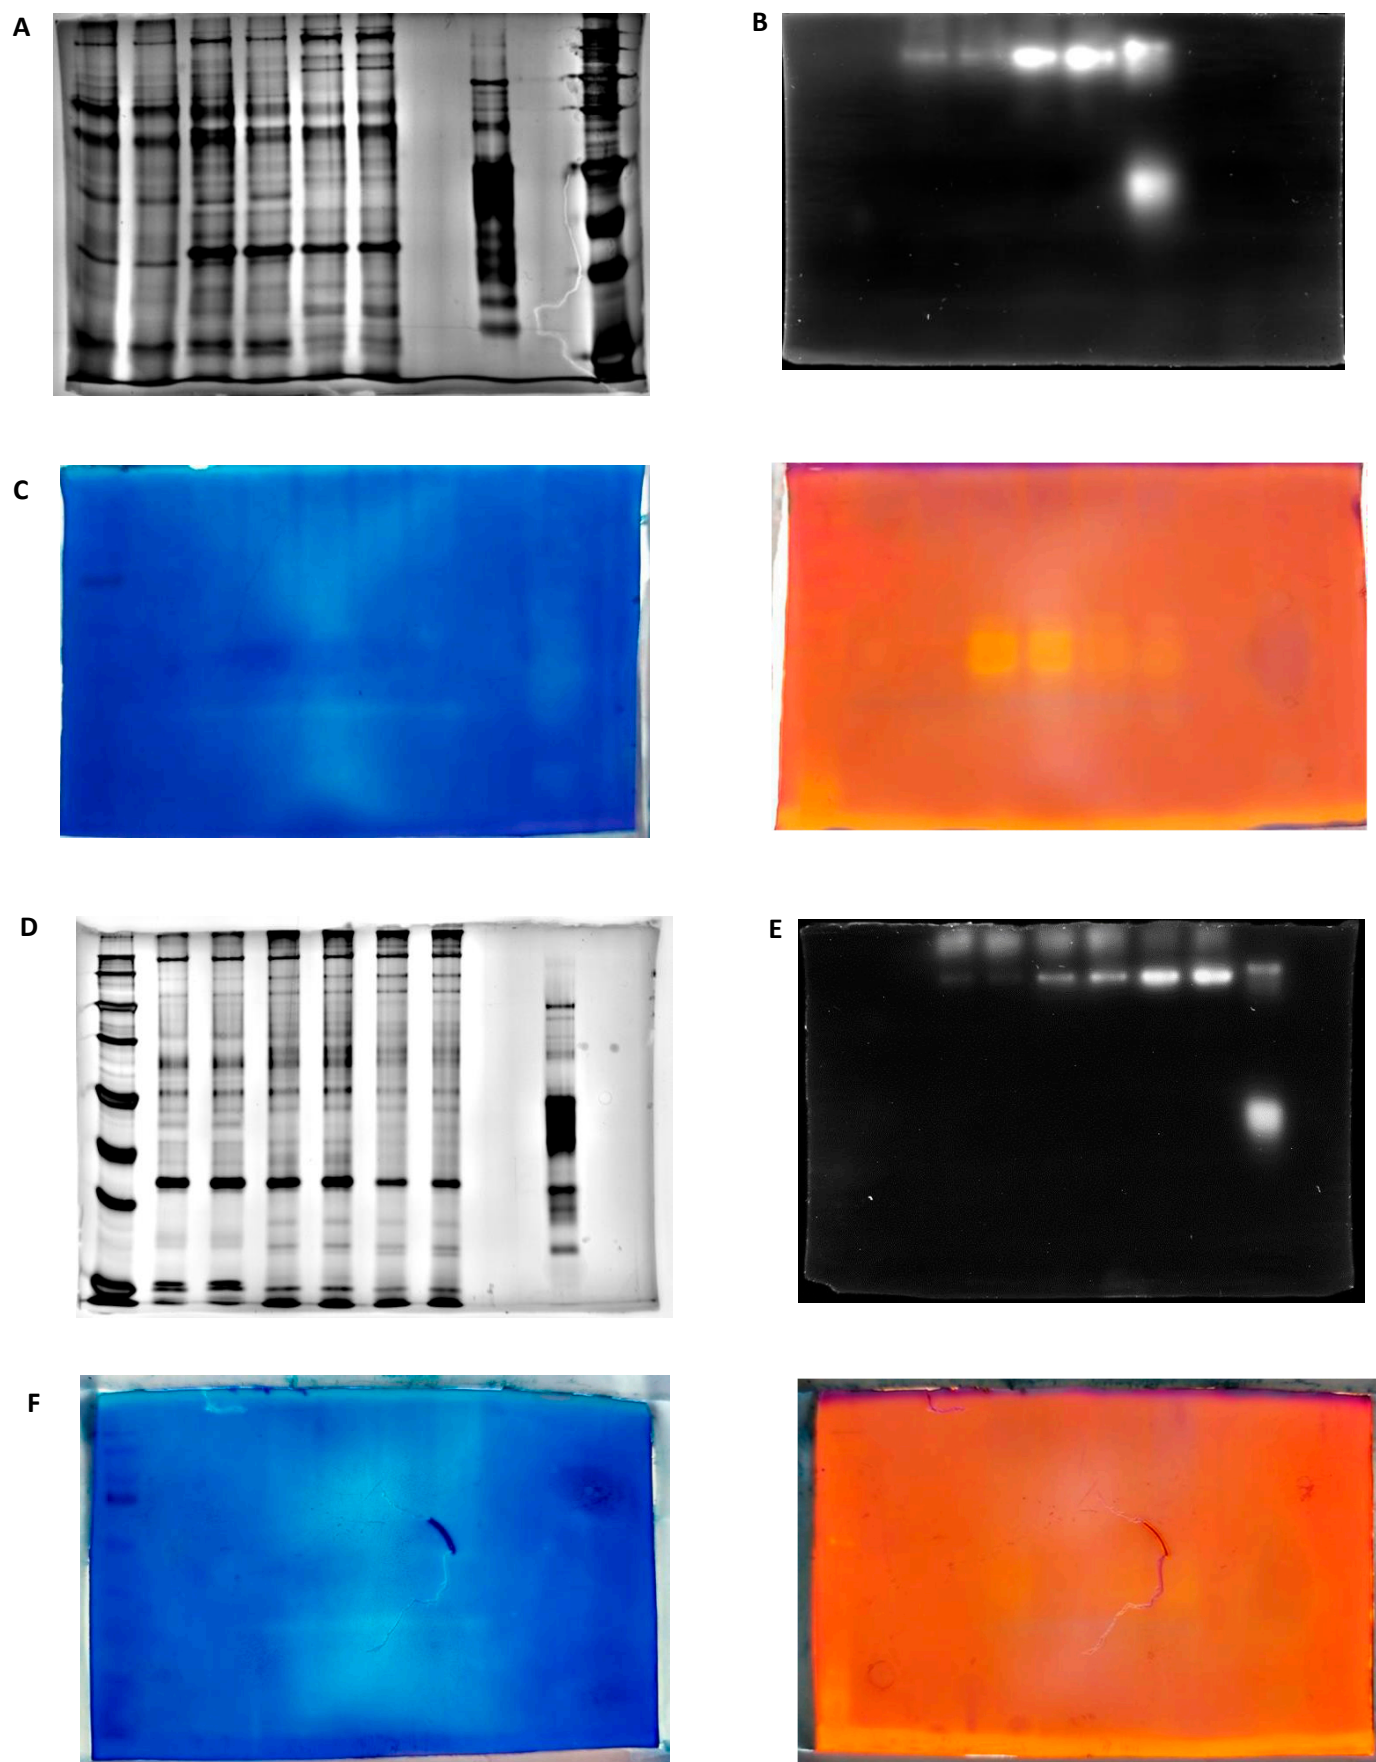



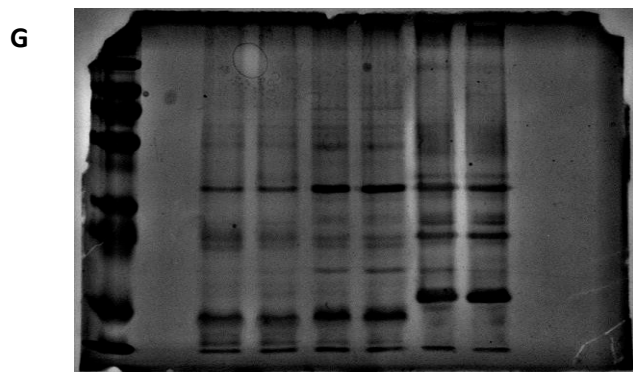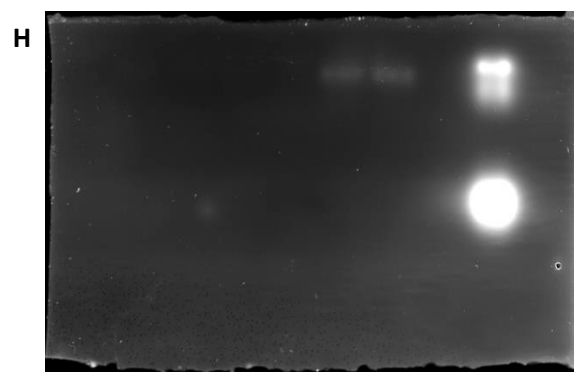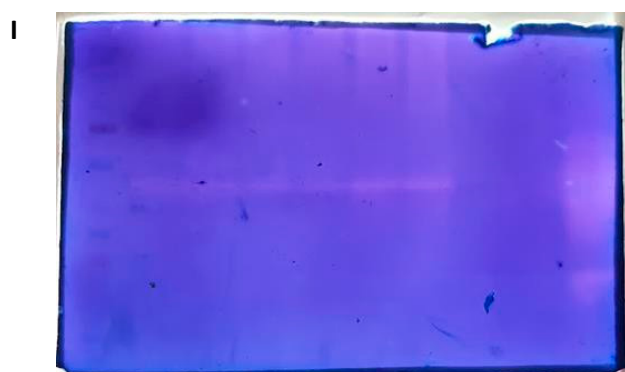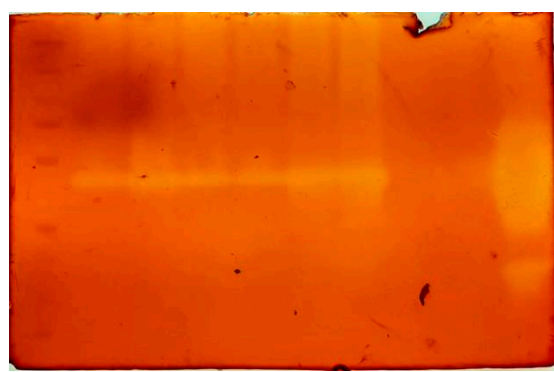

Figure S5:

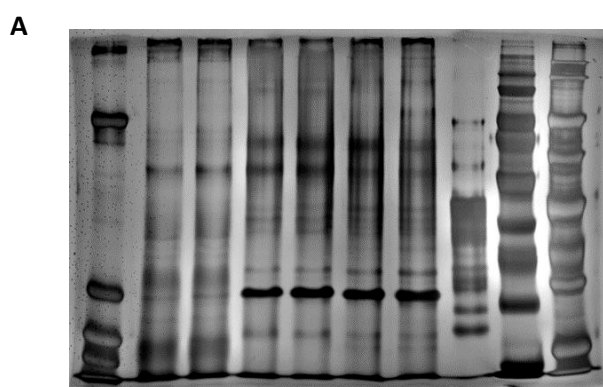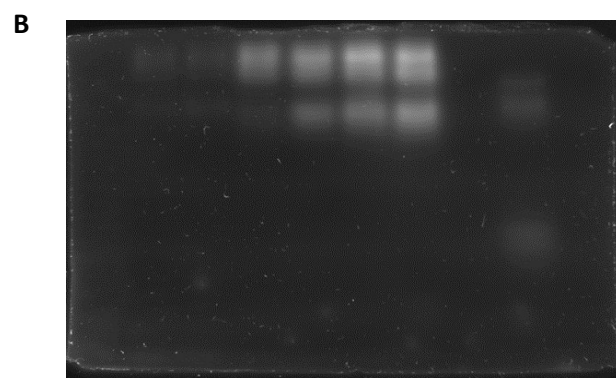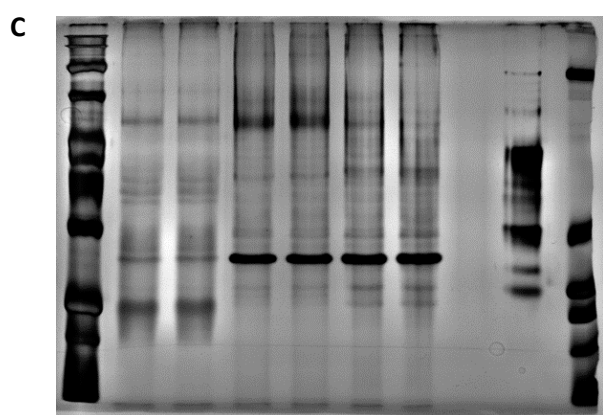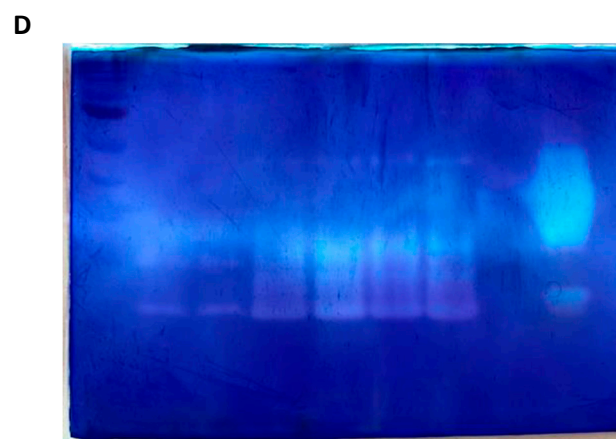

Supplement: s1 [file s1]
