# Supplementary material
Source: MDPI journal article supplement (https://www.mdpi.com/2311-5637/9/9/780)
Supplement: s1 [file s1 › Supplementary File S1.xlsx]

## Sheet: Statistics
Section 3.1: Statistical differences between fungal xylanase activities
																													Single GLC shake-flask xylanase activity measurements (IU/mL) over 2 seperate experiments under the same conditions, and their std. dev.
(A) Student's t-test (two-tailed):																													All values are averages of triplicate measurements.
H0 = there is no statistically significant difference between peak xylanase activities in sample pairs.
		E. maritima			P. chrysogenum				T. stollii	P. antarcticum			P. antarcticum					E. maritima		P. chrysogenum		T. stollii	P. antarcticum								Time-point (h)	0	36	48	72	84	96	108	120	132	144
		SFI-F16	SFI-D6		SFI-D13	BBW2			SFI-F17	SFI-F25			SFI-F25 (96h)	SFI-F25 (132h)				SFI-F16	SFI-D6	SFI-D13	BBW2	SFI-F17	SFI-F25		SFI-F25 (132h)				E. maritima SFI-F17		study 1	1.16069	0.244675	0.258481	1.32609	1.49683	2.60628	4.29323	4.433	4.71396	0.0913451
peak xylanase (IU/mL)		43.3438	51.2693		149.79	178.085			12.6122	18.5519			18.5519	17.4042			IU/mL xylanase	43.3438	51.2693	149.79	178.085	12.6122	18.5519		17.4042						study 2	1.70312	0.130685	0.0430802	2.08986	1.68394	1.93781	4.13932	4.77437	4.44658	0.844942
		46.6566	50.7436		154.182	184.775			13.8531	22.3524			22.3524	18.809				46.6566	50.7436	154.182	184.775	13.8531	22.3524		18.809						std. dev	0.383557	0.0806028	0.152312	0.540066	0.132303	0.472679	0.108832	0.241386	0.18907	0.532873
																	Mean	45.0002	51.0065	151.986	181.43	13.2327	20.4522		18.1066
p-value		0.163836			0.0264511				0.136849				0.420037				Std dev.	2.3425	0.37177	3.10606	4.73053	0.877468	2.68737		0.99336				P. antarcticum SFI-F25		study 1	0.338291	0.0935521	2.86484	1.18116	0.359816	2.46357	5.09463	8.31968	8.8816	5.32085
		p>0.05			p<0.05				p>0.05				p>0.05																		study 2	0.0758239	0.144502	2.38698	1.87681	0.29275	2.74899	4.37208	7.74417	8.76079	4.28363
		H0 is true			H0 is false				H0 is true				H0 is true																		std. dev	0.185592	0.036027	0.337895	0.4919	0.0474227	0.201818	0.51092	0.406946	0.085429	0.733427
Conclusions:
There is no statistically significant difference between E. maritima SFI-F16 and SFI-D6 peak xylanase activities, or between T. stollii SFI-F17 & P. antarcticum SFI-F25 peak xylanase activities.																													T. stollii SFI-F17		study 1	0.635754	0.849165	0.0861605	2.46377	0.331031	6.895	0.314837	12.6278	2.47873	2.94588
There is a statistically significant difference between P. chrysogenum SFI-D13 and BBW2 peak xylanase activities.																															study 2	0.796734	1.64105	1.44642	3.52174	0.116005	5.90356	1.47401	9.33731	3.03871	2.5024
																															std. dev	0.11383	0.559946	0.961848	0.748098	0.152046	0.701052	0.819658	2.32673	0.395964	0.313588
(B) ANOVA (one-way):
																													E. maritima SFI-D6		study 1	3.36541	0.223086	0.0646204	1.2971	2.25245	4.65675	0.0715538	5.51003	5.4632	1.34734
		E. maritima		P. chrysogenum		T. stollii	P. antarcticum				E. maritima		P. chrysogenum		P. antarcticum				P. chrysogenum		P. antarcticum										study 2	2.02071	0.900115	0.234249	0.471014	2.65544	6.42722	0.100175	6.2698	7.09429	2.07737
		SFI-F16	SFI-D6	SFI-D13	BBW2	SFI-F17	SFI-F25				SFI-F16	SFI-D6	SFI-D13	BBW2	SFI-F25				SFI-D13	BBW2	SFI-F25										std. dev	0.950851	0.478732	0.119945	0.584132	0.28496	1.25191	0.0202385	0.537242	1.15336	0.516209
peak xylanase (IU/mL)		43.3438	51.2693	149.79	178.085	12.6122	18.5519		peak xylanase (IU/mL)		43.3438	51.2693	149.79	178.085	18.5519				149.79	178.085	18.5519
		46.6566	50.7436	154.182	184.775	13.8531	22.3524				46.6566	50.7436	154.182	184.775	22.3524				154.182	184.775	22.3524								P. chrysogenum SFI-D13		study 1	1.42316	0.223086	1.68013	1.84058	2.41796	1.66925	2.04644	12.9556	10.0523	2.35214
																															study 2	2.683	0.158319	2.96338	1.81884	2.81376	0.469046	0.994598	10.2864	8.16866	4.29322
SUMMARY									SUMMARY										SUMMARY												std. dev	0.890843	0.0457971	0.907397	0.0153719	0.279871	0.848674	0.743764	1.88738	1.33193	1.37255
Groups	Count	Sum	Average	Variance					Groups	Count	Sum	Average	Variance						Groups	Count	Sum	Average	Variance
SFI-F16	2	90.0004	45.0002	5.48731					SFI-F16	2	90.0004	45.0002	5.48731						Column 1	2	303.972	151.986	9.6476						P. chrysogenum BBW2		study 1	0.215806	0.201497	0.107701	0.898551	2.31721	0.938093	1.83178	13.4239	0.124873	3.92784
SFI-D6	2	102.013	51.0065	0.138213					SFI-D6	2	102.013	51.0065	0.138213						Column 2	2	362.86	181.43	22.3779								study 2	0.565763	2.01497	0.796984	2.58696	2.52591	0.924297	0.00715538	10.4632	0.73363	2.35214
SFI-D13	2	303.972	151.986	9.6476					SFI-D13	2	303.972	151.986	9.6476						Column 3	2	40.9043	20.4522	7.22194								std. dev	0.247456	1.28232	0.487397	1.19388	0.147568	0.00975488	1.2902	2.09351	0.430456	1.11419
BBW2	2	362.86	181.43	22.3779					BBW2	2	362.86	181.43	22.3779
SFI-F17	2	26.4653	13.2327	0.76995					SFI-F25	2	40.9043	20.4522	7.22194
SFI-F25	2	40.9043	20.4522	7.22194
ANOVA									ANOVA										ANOVA
Source of Variation	SS	df	MS	F	P-value	F crit			Source of Variation	SS	df	MS	F	P-value	F crit				Source of Variation	SS	df	MS	F	P-value	F crit
Between Groups	50983.8	5	10196.8	1340.42	4.69127e-09	4.38737			Between Groups	41168.2	4	10292	1146.8	1.36806e-07	5.19217				Between Groups	29388	2	14694	1123.18	4.87073e-05	9.55209
Within Groups	45.643	6	7.60716						Within Groups	44.873	5	8.9746							Within Groups	39.2475	3	13.0825
Total	51029.5	11							Total	41213.1	9								Total	29427.2	5
Conclusions:
The six fungal isolates produce statistically significant differences in mean peak xylanase activities.
The E. maritima, P. chrysogenum and P.antarcticum fungal isolates produce statistically significant differences in mean peak xylanase activities.
The Penicillium sp.isolates produce statistically significant differences in mean peak xylanase activities.
Section 3.2: Statistical differences between fungal α-L-arabinofuranosidase activities
(A) Student's t-test (two-tailed):
H0 = there is no statistically significant difference between peak α-L-arabinofuranosidase activities in sample pairs.
		E. maritima			P. chrysogenum				T. stollii	P. antarcticum			E. maritima	P. chrysogenum		E. maritima	P. chrysogenum		E. maritima	T. stollii		E. maritima	P. antarcticum		E. maritima	P. chrysogenum		E. maritima	P. chrysogenum		E. maritima	T. stollii		E. maritima	P. antarcticum			P. antarcticum	P. chrysogenum		P. antarcticum	P. chrysogenum
		SFI-F16	SFI-D6		SFI-D13	BBW2			SFI-F17	SFI-F25			SFI-F16	SFI-D13		SFI-F16	BBW2		SFI-F16	SFI-F17		SFI-F16	SFI-F25		SFI-D6	SFI-D13		SFI-D6	BBW2		SFI-D6	SFI-F17		SFI-D6	SFI-F25			SFI-F25	SFI-D13		SFI-F25	BBW2
peak α-L-arabinofuranosidase (IU/mL)		1.4694	0.428315		0.24618	0.191331			0.725776	0.210823			1.4694	0.24618		1.4694	0.191331		1.4694	0.725776		1.4694	0.210823		0.428315	0.24618		0.428315	0.191331		0.428315	0.725776		0.428315	0.210823			0.210823	0.24618		0.210823	0.191331
		1.35918	0.334958		0.225241	0.262118			0.796666	0.208771			1.35918	0.225241		1.35918	0.262118		1.35918	0.796666		1.35918	0.208771		0.334958	0.225241		0.334958	0.262118		0.334958	0.796666		0.334958	0.208771			0.208771	0.225241		0.208771	0.262118
p-value		0.00540236			0.843242				0.0407076				0.0246908			0.00596652			0.0163871			0.0290544			0.183039			0.127006			0.0273228			0.168708				0.241716			0.715998
		p<0.05			p>0.05				p<0.05				p<0.05			p<0.05			p<0.05			p<0.05			p>0.05			p>0.05			p<0.05			p>0.05				p>0.05			p>0.05
		H0 is false			H0 is true				H0 is false				H0 is false			H0 is false			H0 is false			H0 is false			H0 is true			H0 is true			H0 is false			H0 is true				H0 is true			H0 is true
Conclusions:
There is a statistically significant difference between E. maritima SFI-F16 and SFI-D6 peak α-L-arabinofuranosidase activities.
There is not a statistically significant difference between P. chrysogenum SFI-D13 and BBW2 peak α-L-arabinofuranosidase activities.
There is a statistically significant difference between T. stollii SFI-F17 and P. antracticum SFI-F25 peak α-L-arabinofuranosidase activities.
There is a statistically significant difference between E. maritima SFI-F16 and all other isolate peak α-L-arabinofuranosidase activities.
There is a statistically significant difference between E. maritima SFI-D6, E.maritima SFI-F16 and T. stollii SFI-F17 peak α-L-arabinofuranosidase activities.
There is no statistically significant difference between Penicillium sp. peak α-L-arabinofuranosidase activities.
(B) ANOVA (one-way):
H0= there is no difference between mean values for peak α-L-arabinofuranosidase activity (IU/mL) for the isolates.
		E. maritima		P. chrysogenum		T. stollii	P. antarcticum						P. chrysogenum		P. antarcticum
		SFI-F16	SFI-D6	SFI-D13	BBW2	SFI-F17	SFI-F25						SFI-D13	BBW2	SFI-F25
peak α-L-arabinofuranosidase (IU/mL)		1.4694	0.428315	0.24618	0.191331	0.725776	0.210823		peak α-L-arabinofuranosidase (IU/mL)				0.24618	0.191331	0.210823
		1.35918	0.334958	0.225241	0.262118	0.796666	0.208771						0.225241	0.262118	0.208771
SUMMARY									SUMMARY
Groups	Count	Sum	Average	Variance					Groups	Count	Sum	Average	Variance
SFI-F16	2	2.82858	1.41429	0.00607434					SFI-D13	2	0.47142	0.23571	0.00021923
SFI-D6	2	0.763273	0.381636	0.00435779					BBW2	2	0.45345	0.226725	0.00250543
SFI-D13	2	0.47142	0.23571	0.00021923					SFI-F25	2	0.419595	0.209797	2.10496e-06
BBW2	2	0.45345	0.226725	0.00250543
SFI-F17	2	1.52244	0.761221	0.00251269
SFI-F25	2	0.419595	0.209797	2.10496e-06
ANOVA									ANOVA
Source of Variation	SS	df	MS	F	P-value	F crit			Source of Variation	SS	df	MS	F	P-value	F crit
Between Groups	2.2763	5	0.45526	174.3	2.08177e-06	4.38737			Between Groups	0.000692501	2	0.000346251	0.380947	0.712151	9.55209
Within Groups	0.0156716	6	0.00261193						Within Groups	0.00272676	3	0.000908921
Total	2.29197	11							Total	0.00341926	5
Conclusions:
For all six isolates, the six fungal isolates produce statistically significant differences in mean peak α-L-arabinofuranosidase activities.
For P. chrysogenum SFI-D13, BBW2 and P. antarcticum SFI-F25, these Penicillium sp.isolates do not produce statistically significant differences in mean peak α-L-arabinofuranosidase activities.
Section 3.2: Statistical differences between fungal β-D-cellobiosidase activities
(A) Student's t-test (two-tailed):
H0 = there is no statistically significant difference between peak β-D-cellobiosidase activities in sample pairs.
		E. maritima			P. chrysogenum				T. stollii	P. antarcticum			E. maritima	P. chrysogenum		E. maritima	P. chrysogenum		E. maritima	T. stollii		E. maritima	P. antarcticum			E. maritima	P. antarcticum		E. maritima	P. chrysogenum		E. maritima	P. chrysogenum		E. maritima	T. stollii		P. antarcticum	P. chrysogenum		P. antarcticum	P. chrysogenum
		SFI-F16	SFI-D6		SFI-D13	BBW2			SFI-F17	SFI-F25			SFI-F16	SFI-D13		SFI-F16	BBW2		SFI-F16	SFI-F17		SFI-F16	SFI-F25			SFI-D6	SFI-F25		SFI-D6	SFI-D13		SFI-D6	BBW2		SFI-D6	SFI-F17		SFI-F25	SFI-D13		SFI-F25	BBW2
peak β-D-cellobiosidase (IU/mL)		0.525601	0.112289		0.025996	0.124329			0.250966	0.0366197			0.525601	0.025996		0.525601	0.124329		0.525601	0.250966		0.525601	0.0366197			0.112289	0.0366197		0.112289	0.025996		0.112289	0.124329		0.112289	0.250966		0.0366197	0.025996		0.0366197	0.124329
		0.600283	0.122241		0.034473	0.109635			0.279127	0.0383099			0.600283	0.034473		0.600283	0.109635		0.600283	0.279127		0.600283	0.0383099			0.122241	0.0383099		0.122241	0.034473		0.122241	0.109635		0.122241	0.279127		0.0383099	0.034473		0.0383099	0.109635
p-value		0.0495244			0.0190425				0.0386795				0.0420907			0.0455508			0.0521184			0.045061				0.0347127			0.0061593			0.977834			0.0389119			0.329252			0.0557282
		p<0.05			p<0.05				p<0.05				p<0.05			p<0.05			p>0.05			p>0.05				p<0.05			p<0.05			p>0.05			p<0.05			p>0.05			p>0.05
		H0 is false			H0 is false				H0 is false				H0 is false			H0 is false			H0 is true			H0 is false				H0 is false			H0 is false			H0 is true			H0 is false			H0 is true			H0 is true
Conclusions:
There is a statistically significant difference between E. maritima SFI-F16 and SFI-D6 peak β-D-cellobiosidase activities.
There is a statistically significant difference between P. chrysogenum SFI-D13 and BBW2 peak β-D-cellobiosidase activities.
There is a statistically significant difference between T. stollii SFI-F17 and P. antracticum SFI-F25 peak β-D-cellobiosidase activities.
There is a statistically significant difference between E. maritima SFI-F16 and all other isolate peak β-D-cellobiosidase activities, except for T. stollii SFI-F17.
There is not a statistically significant difference between E. maritima SFI-D6 and P. chrysogenum BBW2 peak β-D-cellobiosidase activities.
There is statistically significant difference between P. chrysogenum SFI-D13 and BBW2 when compared with P. antarcticumpeak β-D-cellobiosidase activities.
(B) ANOVA (one-way):
H0= there is no difference between mean values for peak β-D-cellobiosidase activity (IU/mL) for the isolates.
	E. maritima		P. chrysogenum		T. stollii	P. antarcticum			P. chrysogenum		P. antarcticum
	SFI-F16	SFI-D6	SFI-D13	BBW2	SFI-F17	SFI-F25			SFI-D13	BBW2	SFI-F25
peak β-D-cellobiosidase (IU/mL)	0.525601	0.112289	0.025996	0.124329	0.250966	0.0366197			0.025996	0.124329	0.0366197
	0.600283	0.122241	0.034473	0.109635	0.279127	0.0383099			0.034473	0.109635	0.0383099
SUMMARY									SUMMARY
Groups	Count	Sum	Average	Variance					Groups	Count	Sum	Average	Variance
SFI-F16	2	1.12588	0.562942	0.00278868					SFI-D13	2	0.0604691	0.0302345	3.59295e-05
SFI-D6	2	0.23453	0.117265	4.95208e-05					BBW2	2	0.233964	0.116982	0.000107948
SFI-D13	2	0.0604691	0.0302345	3.59295e-05					SFI-F25	2	0.0749296	0.0374648	1.42829e-06
BBW2	2	0.233964	0.116982	0.000107948
SFI-F17	2	0.530093	0.265047	0.000396507
SFI-F25	2	0.0749296	0.0374648	1.42829e-06
ANOVA									ANOVA
Source of Variation	SS	df	MS	F	P-value	F crit			Source of Variation	SS	df	MS	F	P-value	F crit
Between Groups	0.40823	5	0.0816459	144.933	3.60035e-06	4.38737			Between Groups	0.00926697	2	0.00463348	95.6633	0.00191815	9.55209
Within Groups	0.00338002	6	0.000563336						Within Groups	0.000145306	3	4.84353e-05
Total	0.41161	11							Total	0.00941227	5
Conclusions:
For all six isolates, the six fungal isolates produce statistically significant differences in mean peak β-D-cellobiosidase activities.
The Penicillium sp.isolates produce statistically significant differences in mean peak β-D-cellobiosidase activities.
Section 3.2: Statistical differences between fungal β-D-glucosidase activities
(A) Student's t-test (two-tailed):
H0 = there is no statistically significant difference between peak β-D-glucosidase activities in sample pairs.
		E. maritima			P. chrysogenum				T. stollii	P. antarcticum			E. maritima	P. chrysogenum		E. maritima	P. chrysogenum		E. maritima	T. stollii		E. maritima	P. antarcticum		E. maritima	P. chrysogenum		E. maritima	P. chrysogenum		E. maritima	T. stollii		T. stollii	P. chrysogenum			T. stollii	P. chrysogenum			P. antarcticum	P. chrysogenum		P. antarcticum	P. chrysogenum
		SFI-F16	SFI-D6		SFI-D13	BBW2			SFI-F17	SFI-F25			SFI-F16	SFI-D13		SFI-F16	BBW2		SFI-F16	SFI-F17		SFI-D6	SFI-F25		SFI-D6	SFI-D13		SFI-D6	BBW2		SFI-D6	SFI-F17		SFI-F17	SFI-D13			SFI-F17	BBW2			SFI-F25	SFI-D13		SFI-F25	BBW2
peak β-D-glucosidase (IU/mL)		1.10879	1.36866		1.46369	2.16558			2.14004	0.189884			1.10879	1.46369		1.10879	2.16558		1.10879	2.14004		1.36866	0.189884		1.36866	1.46369		1.36866	2.16558		1.36866	2.14004		2.14004	1.46369			2.14004	2.16558			0.189884	1.46369		0.189884	2.16558
		1.37892	1.30045		1.60949	2.15711			2.46409	0.173495			1.37892	1.60949		1.37892	2.15711		1.37892	2.46409		1.30045	0.173495		1.30045	1.60949		1.30045	2.15711		1.30045	2.46409		2.46409	1.60949			2.46409	2.15711			0.173495	1.60949		0.173495	2.15711
p-value		0.62234			0.0731005				0.048025				0.233445			0.0927775			0.040017			0.0133026			0.177891			0.024124			0.0939554			0.0911595				0.544676				0.0321519			0.000240707
		p>0.05			p>0.05				p<0.05				p>0.05			p>0.05			p<0.05			p>0.05			p>0.05			p>0.05			p>0.05			p>0.05				p>0.05				p<0.05			p<0.05
		H0 is true			H0 is true				H0 is false				H0 is true			H0 is true			H0 is false			H0 is false			H0 is true			H0 is false			H0 is true			H0 is true				H0 is true				H0 is false			H0 is false
Conclusions:
There is no statistically significant difference between E. maritima SFI-F16 and SFI-D6 peak β-D-glucosidase activities.
There is no statistically significant difference between P. chrysogenum SFI-D13 and BBW2 peak β-D-glucosidase activities.
There is a statistically significant difference between T. stollii SFI-F17 and E. maritima SFI-F16 peak β-D-glucosidase activities.
There is no statistically significant difference between E. maritima SFI-F16 and all other isolate peak β-D-glucosidase activities.
There is a statistically significant difference between E. maritima SFI-D6 and P. chrysogenum BBW2 and P. antarcticum SFI-F25 peak β-D-glucosidase activities.
There is a statistically significant difference between Penicillium sp. peak β-D-glucosidase activities.
(B) ANOVA (one-way):
H0= there is no difference between mean values for peak β-D-glucosidase activity (IU/mL) for the isolates.
		E. maritima		P. chrysogenum		T. stollii	P. antarcticum				P. chrysogenum		P. antarcticum
		SFI-F16	SFI-D6	SFI-D13	BBW2	SFI-F17	SFI-F25				SFI-D13	BBW2	SFI-F25
peak β-D-glucosidase (IU/mL)		1.10879	1.36866	1.46369	2.16558	2.14004	0.189884				1.46369	2.16558	0.189884
		1.37892	1.30045	1.60949	2.15711	2.46409	0.173495				1.60949	2.15711	0.173495
SUMMARY											SUMMARY
Groups	Count	Sum	Average	Variance							Groups	Count	Sum	Average	Variance
SFI-F16	2	2.48771	1.24385	0.0364859							SFI-D13	2	3.07318	1.53659	0.0106294
SFI-D6	2	2.66912	1.33456	0.00232639							BBW2	2	4.32269	2.16135	3.59295e-05
SFI-D13	2	3.07318	1.53659	0.0106294							SFI-F25	2	0.363379	0.18169	0.000134297
BBW2	2	4.32269	2.16135	3.59295e-05
SFI-F17	2	4.60413	2.30206	0.052503
SFI-F25	2	0.363379	0.18169	0.000134297
ANOVA											ANOVA
Source of Variation	SS	df	MS	F	P-value	F crit					Source of Variation	SS	df	MS	F	P-value	F crit
Between Groups	5.80671	5	1.16134	68.2373	3.32152e-05	4.38737					Between Groups	4.09674	2	2.04837	569.012	0.000134815	9.55209
Within Groups	0.102115	6	0.0170191								Within Groups	0.0107996	3	0.00359987
Total	5.90882	11									Total	4.10754	5
Conclusions:
For all six isolates, the six fungal isolates produce statistically significant differences in mean peak β-D-glucosidase activities.
The Penicillium sp.isolates produced statistically significant differences in mean peak β-D-glucosidase activities.
Section 3.2: Statistical differences between fungal β-D-lactosidase activities
(A) Student's t-test (two-tailed):
H0 = there is no statistically significant difference between peak β-D-lactosidase activities in sample pairs.
		E. maritima			P. chrysogenum				T. stollii	P. antarcticum			E. maritima	P. chrysogenum		E. maritima	P. chrysogenum		E. maritima	T. stollii		E. maritima	P. antarcticum		E. maritima	P. chrysogenum		E. maritima	P. chrysogenum		E. maritima	T. stollii		T. stollii	P. chrysogenum			T. stollii	P. chrysogenum			P. antarcticum	P. chrysogenum		P. antarcticum	P. chrysogenum
		SFI-F16	SFI-D6		SFI-D13	BBW2			SFI-F17	SFI-F25			SFI-F16	SFI-D13		SFI-F16	BBW2		SFI-F16	SFI-F17		SFI-D6	SFI-F25		SFI-D6	SFI-D13		SFI-D6	BBW2		SFI-D6	SFI-F17		SFI-F17	SFI-D13			SFI-F17	BBW2			SFI-F25	SFI-D13		SFI-F25	BBW2
peak β-D-lactosidase (IU/mL)		0.181542	0.0335132		0.0426136	0.0113604			0.581534	0.0107924			0.181542	0.0426136		0.181542	0.0113604		0.181542	0.581534		0.0335132	0.0107924		0.0335132	0.0426136		0.0335132	0.0113604		0.0335132	0.581534		0.581534	0.0426136			0.581534	0.0113604			0.0107924	0.0426136		0.0107924	0.0113604
		0.218344	0.0193127		0.0264205	0.0198807			0.674716	0.0107924			0.218344	0.0264205		0.218344	0.0198807		0.218344	0.674716		0.0193127	0.0107924		0.0193127	0.0264205		0.0193127	0.0198807		0.0193127	0.674716		0.674716	0.0264205			0.674716	0.0198807			0.0107924	0.0264205		0.0107924	0.0198807
p-value		0.0413957			0.214181				0.0479556				0.0391085			0.0521705			0.0419441			0.271599			0.531396			0.345856			0.0446332			0.0439933				0.0466416				0.209371			0.460263
		p<0.05			p>0.05				p<0.05				p<0.05			p>0.05			p<0.05			p>0.05			p>0.05			p>0.05			p<0.05			p<0.05				p<0.05				p>0.05			p>0.05
		H0 is false			H0 is true				H0 is false				H0 is false			H0 is true			H0 is false			H0 is true			H0 is true			H0 is true			H0 is false			H0 is false				H0 is false				H0 is true			H0 is true
Conclusions:
There is a statistically significant difference between T. stollii SFI-F17 and all other isolates for peak mean β-D-lactosidase activities.
There is a statistically significant difference between E. maritima isolates for peak mean β-D-lactosidase activities.
There is no statistical difference between Penicillium sp. isolates.
(B) ANOVA (one-way):
H0= there is no difference between mean values for peak β-D-lactosidase activity (IU/mL) for the isolates.
		E. maritima		P. chrysogenum		T. stollii	P. antarcticum					P. chrysogenum		P. antarcticum
		SFI-F16	SFI-D6	SFI-D13	BBW2	SFI-F17	SFI-F25					SFI-D13	BBW2	SFI-F25
peak β-D-lactosidase (IU/mL)		0.181542	0.0335132	0.0426136	0.0113604	0.581534	0.0107924					0.0426136	0.0113604	0.0107924
		0.218344	0.0193127	0.0264205	0.0198807	0.674716	0.0107924					0.0264205	0.0198807	0.0107924
SUMMARY											SUMMARY
Groups	Count	Sum	Average	Variance							Groups	Count	Sum	Average	Variance
SFI-F16	2	0.399886	0.199943	0.000677195							SFI-D13	2	0.0690341	0.034517	0.00013111
SFI-D6	2	0.0528259	0.026413	0.000100827							BBW2	2	0.0312411	0.0156206	3.62978e-05
SFI-D13	2	0.0690341	0.034517	0.00013111							SFI-F25	2	0.0215848	0.0107924	0
BBW2	2	0.0312411	0.0156206	3.62978e-05
SFI-F17	2	1.25625	0.628125	0.00434143
SFI-F25	2	0.0215848	0.0107924	0
ANOVA											ANOVA
Source of Variation	SS	df	MS	F	P-value	F crit					Source of Variation	SS	df	MS	F	P-value	F crit
Between Groups	0.59421	5	0.118842	134.873	4.45634e-06	4.38737					Between Groups	0.000628832	2	0.000314416	5.63444	0.0964043	9.55209
Within Groups	0.00528686	6	0.000881143								Within Groups	0.000167407	3	5.58025e-05
Total	0.599497	11									Total	0.000796239	5
For all six isolates, the six fungal isolates produce statistically significant differences in mean peak β-D-lactosidase activities.
The Penicillium sp.isolates did not produce statistically significant differences in mean peak β-D-lactosidase activities.
Section 3.2: Statistical differences between fungal β-D-galactosidase activities
(A) Student's t-test (two-tailed):
H0 = there is no statistically significant difference between peak β-D-galactosidase activities in sample pairs.
		E. maritima			P. chrysogenum				T. stollii	P. antarcticum			E. maritima	P. chrysogenum		E. maritima	P. chrysogenum		E. maritima	T. stollii		E. maritima	P. antarcticum		E. maritima	P. chrysogenum		E. maritima	P. chrysogenum		E. maritima	T. stollii		T. stollii	P. chrysogenum			T. stollii	P. chrysogenum		P. antarcticum	P. chrysogenum		P. antarcticum	P. chrysogenum
		SFI-F16	SFI-D6		SFI-D13	BBW2			SFI-F17	SFI-F25			SFI-F16	SFI-D13		SFI-F16	BBW2		SFI-F16	SFI-F17		SFI-D6	SFI-F25		SFI-D6	SFI-D13		SFI-D6	BBW2		SFI-D6	SFI-F17		SFI-F17	SFI-D13			SFI-F17	BBW2		SFI-F25	SFI-D13		SFI-F25	BBW2
peak β-D-galactosidase (IU/mL)		0.0367335	0.0217355		0.799661	0.43176			2.25815	0.136197			0.0367335	0.799661		0.0367335	0.43176		0.0367335	2.25815		0.0217355	0.136197		0.0217355	0.799661		0.0217355	0.43176		0.0217355	2.25815		2.25815	0.799661			2.25815	0.43176		0.136197	0.799661		0.136197	0.43176
		0.0350381	0.0206493		0.853914	0.421023			2.39231	0.12998			0.0350381	0.853914		0.0350381	0.421023		0.0350381	2.39231		0.0206493	0.12998		0.0206493	0.853914		0.0206493	0.421023		0.0206493	2.39231		2.39231	0.853914			2.39231	0.421023		0.12998	0.853914		0.12998	0.421023
p-value		0.00866747			0.0362206				0.0192222				0.0217017			0.00723561			0.0186301			0.0146248			0.0213778			0.00779229			0.0185221			0.0128264				0.0216625			0.0231266			0.00164095
		p<0.05			p<0.05				p<0.05				p<0.05			p<0.05			p<0.05			p<0.05			p<0.05			p<0.05			p<0.05			p<0.05				p<0.05			p<0.05			p<0.05
		H0 is false			H0 is false				H0 is false				H0 is false			H0 is false			H0 is false			H0 is false			H0 is false			H0 is false			H0 is false			H0 is false				H0 is false			H0 is false			H0 is false
Conclusions:
There is a statistically significant difference between T. stollii SFI-F17 and all other isolates for peak mean β-D-galactosidase activities.
There is a statistically significant difference between the E. maritima strains for peak mean β-D-galactosidase activities.
There is a statistically significant difference between the Penicillium sp. strains for peak mean β-D-galactosidase activities.
(B) ANOVA (one-way):
H0= there is no difference between mean values for peak β-D-galactosidase activity (IU/mL) for the isolates.
		E. maritima		P. chrysogenum		T. stollii	P. antarcticum				P. chrysogenum		P. antarcticum
		SFI-F16	SFI-D6	SFI-D13	BBW2	SFI-F17	SFI-F25				SFI-D13	BBW2	SFI-F25
peak β-D-galactosidase (IU/mL)		0.0367335	0.0217355	0.799661	0.43176	2.25815	0.136197				0.799661	0.43176	0.136197
		0.0350381	0.0206493	0.853914	0.421023	2.39231	0.12998				0.853914	0.421023	0.12998
SUMMARY											SUMMARY
Groups	Count	Sum	Average	Variance							Groups	Count	Sum	Average	Variance
SFI-F16	2	0.0717717	0.0358858	1.43718e-06							SFI-D13	2	1.65357	0.826787	0.00147167
SFI-D6	2	0.0423849	0.0211924	5.89896e-07							BBW2	2	0.852783	0.426392	5.76469e-05
SFI-D13	2	1.65357	0.826787	0.00147167							SFI-F25	2	0.266177	0.133088	1.93221e-05
BBW2	2	0.852783	0.426392	5.76469e-05
SFI-F17	2	4.65047	2.32523	0.00899975
SFI-F25	2	0.266177	0.133088	1.93221e-05
ANOVA											ANOVA
Source of Variation	SS	df	MS	F	P-value	F crit					Source of Variation	SS	df	MS	F	P-value	F crit
Between Groups	7.84903	5	1.56981	892.745	1.58498e-08	4.38737					Between Groups	0.485041	2	0.24252	469.806	0.000179549	9.55209
Within Groups	0.0105504	6	0.0017584								Within Groups	0.00154864	3	0.000516214
Total	7.85958	11									Total	0.48659	5
Conclusions:
For all six isolates, the six fungal isolates produce statistically significant differences in mean peak β-D-galactosidase activities.
The Penicillium sp.isolates produced statistically significant differences in mean peak β-D-galactosidase activities.
Section 3.2: Statistical differences between fungal β-D-xylosidase activities
(A) Student's t-test (two-tailed):
H0 = there is no statistically significant difference between peak β-D-xylosidase activities in sample pairs.
		E. maritima			P. chrysogenum				T. stollii	P. antarcticum			E. maritima	P. chrysogenum		E. maritima	P. chrysogenum		E. maritima	T. stollii		E. maritima	P. antarcticum		E. maritima	P. chrysogenum		E. maritima	P. chrysogenum		E. maritima	T. stollii		T. stollii	P. chrysogenum			T. stollii	P. chrysogenum								P. antarcticum	P. chrysogenum
		SFI-F16	SFI-D6		SFI-D13	BBW2			SFI-F17	SFI-F25			SFI-F16	SFI-D13		SFI-F16	BBW2		SFI-F16	SFI-F17		SFI-D6	SFI-F25		SFI-D6	SFI-D13		SFI-D6	BBW2		SFI-D6	SFI-F17		SFI-F17	SFI-D13			SFI-F17	BBW2								SFI-F25	SFI-D13
peak β-D-xylosidase (IU/mL)		0.0220713	0.0161483		0.26335	0.253537			1.32111	0.434635			0.0220713	0.26335		0.0220713	0.253537		0.0220713	1.32111		0.0161483	0.434635		0.0161483	0.26335		0.0161483	0.253537		0.0161483	1.32111		1.32111	0.26335			1.32111	0.253537								0.434635	0.26335
		0.0215054	0.0200054		0.296355	0.260328			1.43045	0.445388			0.0215054	0.296355		0.0215054	0.260328		0.0215054	1.43045		0.0200054	0.445388		0.0200054	0.296355		0.0200054	0.260328		0.0200054	1.43045		1.43045	0.296355			1.43045	0.260328								0.445388	0.296355
p-value		0.29988			0.390379				0.035472				0.0405996			0.00872139			0.0256865			0.00310657			0.0376295			0.00116044			0.0254442			0.0203233				0.0304706									0.0454269
		p>0.05			p>0.05				p<0.05				p<0.05			p<0.05			p<0.05			p<0.05			p<0.05			p<0.05			p<0.05			p<0.05				p<0.05									p<0.05
		H0 is true			H0 is true				H0 is false				H0 is false			H0 is false			H0 is false			H0 is false			H0 is false			H0 is false			H0 is false			H0 is false				H0 is false									H0 is false
Conclusions:
There is a statistically significant difference between T. stollii SFI-F17 and all other isolates for peak mean β-D-xylosidase activities.
There is no statistically significant difference between the E. maritima strains for peak mean β-D-xylosidase activities.
There is a statistically significant difference between the Penicillium sp. strains for peak mean β-D-xylosidase activities.
There is no statistically significant difference between the P.chrysogenum strains for peak mean β-D-xylosidase activities.
(B) ANOVA (one-way):
H0= there is no difference between mean values for peak β-D-xylosidase activity (IU/mL) for the isolates.
		E. maritima		P. chrysogenum		T. stollii	P. antarcticum			P. chrysogenum		P. antarcticum
		SFI-F16	SFI-D6	SFI-D13	BBW2	SFI-F17	SFI-F25			SFI-D13	BBW2	SFI-F25
peak β-D-xylosidase (IU/mL)		0.0220713	0.0161483	0.26335	0.253537	1.32111	0.434635			0.26335	0.253537	0.434635
		0.0215054	0.0200054	0.296355	0.260328	1.43045	0.445388			0.296355	0.260328	0.445388
SUMMARY										SUMMARY
Groups	Count	Sum	Average	Variance						Groups	Count	Sum	Average	Variance
SFI-F16	2	0.0435767	0.0217883	1.60139e-07						SFI-D13	2	0.559706	0.279853	0.000544668
SFI-D6	2	0.0361537	0.0180768	7.43862e-06						BBW2	2	0.513865	0.256933	2.306e-05
SFI-D13	2	0.559706	0.279853	0.000544668						SFI-F25	2	0.880023	0.440011	5.78102e-05
BBW2	2	0.513865	0.256933	2.306e-05
SFI-F17	2	2.75156	1.37578	0.00597738
SFI-F25	2	0.880023	0.440011	5.78102e-05
ANOVA										ANOVA
Source of Variation	SS	df	MS	F	P-value	F crit				Source of Variation	SS	df	MS	F	P-value	F crit
Between Groups	2.55509	5	0.511019	463.823	1.12442e-07	4.38737				Between Groups	0.0397959	2	0.019898	95.428	0.00192514	9.55209
Within Groups	0.00661052	6	0.00110175							Within Groups	0.000625538	3	0.000208513
Total	2.56171	11								Total	0.0404214	5
Conclusions:
For all six isolates, the six fungal isolates produce statistically significant differences in mean peak β-D-xylosidase activities.
The Penicillium sp.isolates produced statistically significant differences in mean peak β-D-xylosidase activities.
Section 3.2: Statistical differences between fungal α-L-fucosidase activities
(A) Student's t-test (two-tailed):
H0 = there is no statistically significant difference between peak α-L-fucosidase activities in sample pairs.
		E. maritima			P. chrysogenum				T. stollii	P. antarcticum			E. maritima	P. chrysogenum		E. maritima	P. chrysogenum		E. maritima	T. stollii		E. maritima	P. antarcticum		E. maritima	P. chrysogenum		E. maritima	P. chrysogenum		E. maritima	T. stollii		T. stollii	P. chrysogenum			T. stollii	P. chrysogenum		P. antarcticum	P. chrysogenum		P. antarcticum	P. chrysogenum
		SFI-F16	SFI-D6		SFI-D13	BBW2			SFI-F17	SFI-F25			SFI-F16	SFI-D13		SFI-F16	BBW2		SFI-F16	SFI-F17		SFI-D6	SFI-F25		SFI-D6	SFI-D13		SFI-D6	BBW2		SFI-D6	SFI-F17		SFI-F17	SFI-D13			SFI-F17	BBW2		SFI-F25	SFI-D13		SFI-F25	BBW2
peak α-L-fucosidase (IU/mL)		0.0407355	0.0356033		0.0180842	0.0265612			0.0412546	0.0352489			0.0407355	0.0180842		0.0407355	0.0265612		0.0407355	0.0412546		0.0356033	0.0352489		0.0356033	0.0180842		0.0356033	0.0265612		0.0356033	0.0412546		0.0412546	0.0180842			0.0412546	0.0265612		0.0352489	0.0180842		0.0352489	0.0265612
		0.0339463	0.029952		0.0209099	0.0197796			0.0463408	0.0405644			0.0339463	0.0209099		0.0339463	0.0197796		0.0339463	0.0463408		0.029952	0.0405644		0.029952	0.0209099		0.029952	0.0197796		0.029952	0.0463408		0.0463408	0.0209099			0.0463408	0.0197796		0.0405644	0.0209099		0.0405644	0.0197796
p-value		0.413127			0.463978				0.250657				0.083001			0.0980698			0.276704			0.317471			0.0863457			0.165571			0.102538			0.02779				0.0460427			0.0472755			0.0819641
		p>0.05			p>0.05				p>0.05				p>0.05			p>0.05			p>0.05			p>0.05			p>0.05			p>0.05			p>0.05			p<0.05				p<0.05			p<0.05			p>0.05
		H0 is true			H0 is true				H0 is true				H0 is true			H0 is true			H0 is true			H0 is true			H0 is true			H0 is true			H0 is true			H0 is false				H0 is false			H0 is false			H0 is true
Conclusions:
There is a statistically significant difference between T. stollii SFI-F17 and the P.chrysogenumisolates for peak mean α-L-fucosidase activities.
There is no statistically significant difference between the E. maritima strains for peak mean α-L-fucosidase activities.
There is a statistically significant difference between the Penicillium sp. strains for peak mean α-L-fucosidase activities.
There is no statistically significant difference between the P.chrysogenum strains for peak mean α-L-fucosidase activities.
(B) ANOVA (one-way):
H0= there is no difference between mean values for peak β-D-xylosidase activity (IU/mL) for the isolates.
		E. maritima		P. chrysogenum		T. stollii	P. antarcticum				P. chrysogenum		P. antarcticum
		SFI-F16	SFI-D6	SFI-D13	BBW2	SFI-F17	SFI-F25				SFI-D13	BBW2	SFI-F25
peak α-L-fucosidase (IU/mL)		0.0407355	0.0356033	0.0180842	0.0265612	0.0412546	0.0352489				0.0180842	0.0265612	0.0352489
		0.0339463	0.029952	0.0209099	0.0197796	0.0463408	0.0405644				0.0209099	0.0197796	0.0405644
SUMMARY											SUMMARY
Groups	Count	Sum	Average	Variance							Groups	Count	Sum	Average	Variance
SFI-F16	2	0.0746818	0.0373409	2.3047e-05							SFI-D13	2	0.0389941	0.019497	3.99217e-06
SFI-D6	2	0.0655552	0.0327776	1.59687e-05							BBW2	2	0.0463408	0.0231704	2.29949e-05
SFI-D13	2	0.0389941	0.019497	3.99217e-06							SFI-F25	2	0.0758133	0.0379066	1.41268e-05
BBW2	2	0.0463408	0.0231704	2.29949e-05
SFI-F17	2	0.0875954	0.0437977	1.29346e-05
SFI-F25	2	0.0758133	0.0379066	1.41268e-05
ANOVA											ANOVA
Source of Variation	SS	df	MS	F	P-value	F crit					Source of Variation	SS	df	MS	F	P-value	F crit
Between Groups	0.000872912	5	0.000174582	11.2556	0.00524475	4.38737					Between Groups	0.00037971	2	0.000189855	13.8533	0.0305374	9.55209
Within Groups	9.30642e-05	6	1.55107e-05								Within Groups	4.11139e-05	3	1.37046e-05
Total	0.000965976	11									Total	0.000420824	5
Conclusions:
For all six isolates, the six fungal isolates produce statistically significant differences in mean peak α-L-fucosidase activities.
The Penicillium sp.isolates produced statistically significant differences in mean peak α-L-fucosidase activities.
Section 3.2: Statistical differences between fungal β-D-mannosidase activities
(A) Student's t-test (two-tailed):
H0 = there is no statistically significant difference between peak β-D-mannosidase activities in sample pairs.
		E. maritima			P. chrysogenum				T. stollii	P. antarcticum			E. maritima	P. chrysogenum		E. maritima	P. chrysogenum		E. maritima	T. stollii		E. maritima	P. antarcticum		E. maritima	P. chrysogenum		E. maritima	P. chrysogenum		E. maritima	T. stollii		T. stollii	P. chrysogenum			T. stollii	P. chrysogenum		P. antarcticum	P. chrysogenum		P. antarcticum	P. chrysogenum
		SFI-F16	SFI-D6		SFI-D13	BBW2			SFI-F17	SFI-F25			SFI-F16	SFI-D13		SFI-F16	BBW2		SFI-F16	SFI-F17		SFI-D6	SFI-F25		SFI-D6	SFI-D13		SFI-D6	BBW2		SFI-D6	SFI-F17		SFI-F17	SFI-D13			SFI-F17	BBW2		SFI-F25	SFI-D13		SFI-F25	BBW2
peak β-D-mannosidase, (IU/mL)		0.00691184	0.00918964		0.00283046	0.0113026			0.177142	0.314606			0.00691184	0.00283046		0.00691184	0.0113026		0.00691184	0.177142		0.00918964	0.314606		0.00918964	0.00283046		0.00918964	0.0113026		0.00918964	0.177142		0.177142	0.00283046			0.177142	0.0113026		0.314606	0.00283046		0.314606	0.0113026
		0.00552105	0.00539655		0.00452873	0.0158237			0.203164	0.349989			0.00552105	0.00452873		0.00552105	0.0158237		0.00552105	0.203164		0.00539655	0.349989		0.00539655	0.00452873		0.00539655	0.0158237		0.00539655	0.203164		0.203164	0.00452873			0.203164	0.0158237		0.349989	0.00452873		0.349989	0.0158237
p-value		0.672511			0.110105				0.0283841				0.15188			0.165658			0.0443931			0.0327183			0.276129			0.17135			0.0412169			0.0435164				0.041154			0.0338511			0.0326035
		p>0.05			p>0.05				p<0.05				p>0.05			p>0.05			p<0.05			p<0.05			p>0.05			p>0.05			p<0.05			p<0.05				p<0.05			p<0.05			p<0.05
		H0 is true			H0 is true				H0 is false				H0 is true			H0 is true			H0 is false			H0 is false			H0 is true			H0 is true			H0 is false			H0 is false				H0 is false			H0 is false			H0 is false
Conclusions:
There is a statistically significant difference between P. antarcticumSFI-F25 and all other isolates for peak mean β-D-mannosidase activities.
There is a statistically significant difference between T. stollii SFI-F17 and all other isolates for peak mean β-D-mannosidase activities.
There is no statistically significant difference between the E. maritima strains for peak mean β-D-mannosidase activities.
There is a statistically significant difference between the Penicillium sp. strains for peak mean β-D-mannosidase activities.
There is no statistically significant difference between the P.chrysogenum strains for peak mean β-D-mannosidase activities.
There is no statistically significant difference between the P.chrysogenum and E. maritima strains for peak mean β-D-mannosidase activities.
(B) ANOVA (one-way):
H0= there is no difference between mean values for peak β-D-mannosidase activity (IU/mL) for the isolates.
		E. maritima		P. chrysogenum		T. stollii	P. antarcticum			P. chrysogenum		P. antarcticum
		SFI-F16	SFI-D6	SFI-D13	BBW2	SFI-F17	SFI-F25			SFI-D13	BBW2	SFI-F25
peak β-D-mannosidase (IU/mL)		0.00691184	0.00918964	0.00283046	0.0113026	0.177142	0.314606			0.00283046	0.0113026	0.314606
		0.00552105	0.00539655	0.00452873	0.0158237	0.203164	0.349989			0.00452873	0.0158237	0.349989
SUMMARY										SUMMARY
Groups	Count	Sum	Average	Variance						Groups	Count	Sum	Average	Variance
Column 1	2	0.0124329	0.00621645	9.67146e-07						SFI-D13	2	0.00735918	0.00367959	1.44207e-06
Column 2	2	0.0145862	0.00729309	7.19378e-06						BBW2	2	0.0271263	0.0135632	1.022e-05
Column 3	2	0.00735918	0.00367959	1.44207e-06						SFI-F25	2	0.664595	0.332297	0.000625974
Column 4	2	0.0271263	0.0135632	1.022e-05
Column 5	2	0.380306	0.190153	0.000338559
Column 6	2	0.664595	0.332297	0.000625974
ANOVA										ANOVA
Source of Variation	SS	df	MS	F	P-value	F crit				Source of Variation	SS	df	MS	F	P-value	F crit
Between Groups	0.191727	5	0.0383454	233.729	8.69571e-07	4.38737				Between Groups	0.139786	2	0.0698929	328.838	0.000305985	9.55209
Within Groups	0.000984356	6	0.000164059							Within Groups	0.000637636	3	0.000212545
Total	0.192711	11								Total	0.140423	5
Conclusions:
For all six isolates, the six fungal isolates produce statistically significant differences in mean peak β-D-mannosidase activities.
The Penicillium sp.isolates produced statistically significant differences in mean peak β-D-mannosidase activities.
Section 3.2: Statistical differences between fungal α-L-rhamnosidase activities
(A) Student's t-test (two-tailed):
H0 = there is no statistically significant difference between peak α-L-rhamnosidase activities in sample pairs.
		E. maritima			P. chrysogenum				T. stollii	P. antarcticum			E. maritima	P. chrysogenum		E. maritima	P. chrysogenum		E. maritima	T. stollii		E. maritima	P. antarcticum		E. maritima	P. chrysogenum		E. maritima	P. chrysogenum		E. maritima	T. stollii		T. stollii	P. chrysogenum		T. stollii	P. chrysogenum		P. antarcticum	P. chrysogenum		P. antarcticum	P. chrysogenum
		SFI-F16	SFI-D6		SFI-D13	BBW2			SFI-F17	SFI-F25			SFI-F16	SFI-D13		SFI-F16	BBW2		SFI-F16	SFI-F17		SFI-D6	SFI-F25		SFI-D6	SFI-D13		SFI-D6	BBW2		SFI-D6	SFI-F17		SFI-F17	SFI-D13		SFI-F17	BBW2		SFI-F25	SFI-D13		SFI-F25	BBW2
peak α-L-rhamnosidase (IU/mL)		0.00791184	0.017529		0.0158326	0.0930508			0.0323843	0.0107375			0.00791184	0.0158326		0.00791184	0.0930508		0.00791184	0.0323843		0.017529	0.0107375		0.017529	0.0158326		0.017529	0.0930508		0.017529	0.0323843		0.0323843	0.0158326		0.0323843	0.0930508		0.0107375	0.0158326		0.0107375	0.0930508
		0.00791184	0.0237489		0.0135708	0.101864			0.036393	0.0113026			0.00791184	0.0135708		0.00791184	0.101864		0.00791184	0.036393		0.0237489	0.0113026		0.0237489	0.0135708		0.0237489	0.101864		0.0237489	0.036393		0.036393	0.0135708		0.036393	0.101864		0.0113026	0.0135708		0.0113026	0.101864
p-value		0.152574			0.0246424				0.050312				0.105069			0.0313044			0.0481021			0.196579			0.28258			0.00739359			0.082752			0.0261498			0.0198927			0.172607			0.0317603
		p>0.05			p<0.05				p>0.05				p>0.05			p<0.05			p<0.05			p>0.05			p>0.05			p<0.05			p>0.05			p<0.05			p<0.05			p>0.05			p<0.05
		H0 is true			H0 is false				H0 is true				H0 is true			H0 is false			H0 is false			H0 is true			H0 is true			H0 is false			H0 is true			H0 is false			H0 is false			H0 is true			H0 is false
Conclusions:
There is no statistically significant difference between the E. maritima strains for peak mean α-L-rhamnosidase activities.
There is a statistically significant difference between the P.chrysogenum strains for peak mean α-L-rhamnosidase activities.
There is a statistically significant difference between P.chrysogenum BBW2 and all other isolates for peak mean α-L-rhamnosidase activities.
(B) ANOVA (one-way):
H0= there is no difference between mean values for peak α-L-rhamnosidase activity (IU/mL) for the isolates.
	E. maritima		P. chrysogenum		T. stollii	P. antarcticum			P. chrysogenum		P. antarcticum
	SFI-F16	SFI-D6	SFI-D13	BBW2	SFI-F17	SFI-F25			SFI-D13	BBW2	SFI-F25
peak α-L-rhamnosidase (IU/mL)	0.00791184	0.017529	0.0158326	0.0930508	0.0323843	0.0107375		peak α-L-rhamnosidase (IU/mL)	0.0158326	0.0930508	0.0107375
	0.00791184	0.0237489	0.0135708	0.101864	0.036393	0.0113026			0.0135708	0.101864	0.0113026
SUMMARY									SUMMARY
Groups	Count	Sum	Average	Variance					Groups	Count	Sum	Average	Variance
SFI-F16	2	0.0158237	0.00791184	1.50463e-34					SFI-D13	2	0.0294034	0.0147017	2.55788e-06
SFI-D6	2	0.0412779	0.020639	1.9344e-05					BBW2	2	0.194915	0.0974576	3.88394e-05
SFI-D13	2	0.0294034	0.0147017	2.55788e-06					SFI-F25	2	0.0220401	0.0110201	1.59687e-07
BBW2	2	0.194915	0.0974576	3.88394e-05
SFI-F17	2	0.0687773	0.0343886	8.03497e-06
SFI-F25	2	0.0220401	0.0110201	1.59687e-07
ANOVA									ANOVA
Source of Variation	SS	df	MS	F	P-value	F crit			Source of Variation	SS	df	MS	F	P-value	F crit
Between Groups	0.0114667	5	0.00229334	199.606	1.39109e-06	4.38737			Between Groups	0.0095557	2	0.00477785	344.913	0.000284935	9.55209
Within Groups	6.89359e-05	6	1.14893e-05						Within Groups	4.1557e-05	3	1.38523e-05
Total	0.0115356	11							Total	0.00959725	5
Conclusions:
The six fungal isolates produce statistically significant differences in mean peak α-L-rhamnosidase activities.
The Penicillium sp. fungal isolates produce statistically significant differences in mean peak α-L-rhamnosidase activities.
Section 3.2: Statistical differences between fungal feruloyl esterase activities
(A) Student's t-test (two-tailed):
H0 = there is no statistically significant difference between peak feruloyl esterase activities in sample pairs.
		E. maritima			P. chrysogenum				T. stollii	P. antarcticum			E. maritima	P. chrysogenum		E. maritima	P. chrysogenum		E. maritima	T. stollii		E. maritima	P. antarcticum		E. maritima	P. chrysogenum		E. maritima	P. chrysogenum		E. maritima	T. stollii			T. stollii	P. chrysogenum			T. stollii	P. chrysogenum		P. antarcticum	P. chrysogenum		P. antarcticum	P. chrysogenum
		SFI-F16	SFI-D6		SFI-D13	BBW2			SFI-F17	SFI-F25			SFI-F16	SFI-D13		SFI-F16	BBW2		SFI-F16	SFI-F17		SFI-D6	SFI-F25		SFI-D6	SFI-D13		SFI-D6	BBW2		SFI-D6	SFI-F17			SFI-F17	SFI-D13			SFI-F17	BBW2		SFI-F25	SFI-D13		SFI-F25	BBW2
peak feruloyl esterase (IU/mL)		0.0556434	0.0296474		0.0935914	0.0461171			0.084473	0.0619921			0.0556434	0.0935914		0.0556434	0.0461171		0.0556434	0.084473		0.0296474	0.0619921		0.0296474	0.0935914		0.0296474	0.0461171		0.0296474	0.084473			0.084473	0.0935914			0.084473	0.0461171		0.0619921	0.0935914		0.0619921	0.0461171
		0.0460802	0.0212145		0.0855552	0.0418765			0.111628	0.0719441			0.0460802	0.0855552		0.0460802	0.0418765		0.0460802	0.111628		0.0212145	0.0719441		0.0212145	0.0855552		0.0212145	0.0418765		0.0212145	0.111628			0.111628	0.0855552			0.111628	0.0418765		0.0719441	0.0855552		0.0719441	0.0418765
p-value		0.0589643			0.0228262				0.233739				0.0268814			0.366192			0.148006			0.0253842			0.00821132			0.0942115			0.0940619				0.644147				0.149438			0.0761929			0.0967941
		p>0.05			p<0.05				p>0.05				p<0.05			p>0.05			p>0.05			p<0.05			p<0.05			p>0.05			p>0.05				p>0.05				p>0.05			p>0.05			p>0.05
		H0 is true			H0 is false				H0 is true				H0 is false			H0 is true			H0 is true			H0 is false			H0 is false			H0 is true			H0 is true				H0 is true				H0 is true			H0 is true			H0 is true
Conclusions:
There is no statistically significant difference between the E. maritima strains for peak mean feruloyl esterase activities.
There is a statistically significant difference between the P.chrysogenum strains for peak mean feruloyl esterase activities.
(B) ANOVA (one-way):
H0= there is no difference between mean values for peak feruloyl esterase activity (IU/mL) for the isolates.
		E. maritima		P. chrysogenum		T. stollii	P. antarcticum				P. chrysogenum		P. antarcticum
		SFI-F16	SFI-D6	SFI-D13	BBW2	SFI-F17	SFI-F25				SFI-D13	BBW2	SFI-F25
peak feruloyl esterase (IU/mL)		0.0556434	0.0296474	0.0935914	0.0461171	0.084473	0.0619921			peak feruloyl esterase (IU/mL)	0.0935914	0.0461171	0.0619921
		0.0460802	0.0212145	0.0855552	0.0418765	0.111628	0.0719441				0.0855552	0.0418765	0.0719441
SUMMARY											SUMMARY
Groups	Count	Sum	Average	Variance							Groups	Count	Sum	Average	Variance
SFI-F16	2	0.101724	0.0508618	4.5727e-05							SFI-D13	2	0.179147	0.0895733	3.229e-05
SFI-D6	2	0.0508618	0.0254309	3.55568e-05							BBW2	2	0.0879936	0.0439968	8.99159e-06
SFI-D13	2	0.179147	0.0895733	3.229e-05							SFI-F25	2	0.133936	0.0669681	4.95208e-05
BBW2	2	0.0879936	0.0439968	8.99159e-06
SFI-F17	2	0.196101	0.0980503	0.000368685
SFI-F25	2	0.133936	0.0669681	4.95208e-05
ANOVA											ANOVA
Source of Variation	SS	df	MS	F	P-value	F crit					Source of Variation	SS	df	MS	F	P-value	F crit
Between Groups	0.00773736	5	0.00154747	17.1696	0.00169674	4.38737					Between Groups	0.00207726	2	0.00103863	34.3151	0.00857112	9.55209
Within Groups	0.000540771	6	9.01286e-05								Within Groups	9.08024e-05	3	3.02675e-05
Total	0.00827814	11									Total	0.00216806	5
Conclusions:
The six fungal isolates produce statistically significant differences in mean peak feruloyl esterase activities.
The Penicillium sp. fungal isolates produce statistically significant differences in mean peak feruloyl esterase activities.
Section 3.2: Total combined peak exo-glycoside hydrolase and feruloyl esterase activities
			E. maritima		P. chrysogenum		T. stollii	P. antarcticum			E. maritima		P. chrysogenum		T. stollii	P. antarcticum
			SFI-F16	SFI-D6	SFI-D13	BBW2	SFI-F17	SFI-F25			SFI-F16	SFI-D6	SFI-D13	BBW2	SFI-F17	SFI-F25
	peak α-L-arabinofuranosidase (IU/mL)		1.4694	0.428315	0.24618	0.191331	0.725776	0.210823		average peak α-L-arabinofuranosidase (IU/mL)	1.41429	0.381636	0.23571	0.226725	0.761221	0.209797
			1.35918	0.334958	0.225241	0.262118	0.796666	0.208771		std. dev.	0.0779381	0.0660136	0.0148064	0.0500542	0.0501268	0.00145085
	peak β-D-cellobiosidase (IU/mL)		0.525601	0.112289	0.025996	0.124329	0.250966	0.0366197		average peak β-D-cellobiosidase (IU/mL)	0.562942	0.117265	0.0302345	0.116982	0.265047	0.0374648
			0.600283	0.122241	0.034473	0.109635	0.279127	0.0383099		std. dev.	0.052808	0.0070371	0.00599412	0.0103898	0.0199125	0.00119511
	peak β-D-glucosidase (IU/mL)		1.10879	1.36866	1.46369	2.16558	2.14004	0.189884		average peak β-D-glucosidase (IU/mL)	1.24385	1.33456	1.53659	2.16135	2.30206	0.18169
			1.37892	1.30045	1.60949	2.15711	2.46409	0.173495		std. dev.	0.191013	0.0482327	0.103099	0.00599412	0.229135	0.0115886
	peak β-D-lactosidase (IU/mL)		0.181542	0.0335132	0.0426136	0.0113604	0.581534	0.0107924		average peak β-D-lactosidase (IU/mL)	0.199943	0.026413	0.034517	0.0156206	0.628125	0.0107924
			0.218344	0.0193127	0.0264205	0.0198807	0.674716	0.0107924		std. dev.	0.026023	0.0100413	0.0114503	0.00602477	0.0658895	0
	peak β-D-galactosidase (IU/mL)		0.0367335	0.0217355	0.799661	0.43176	2.25815	0.136197		average peak β-D-galactosidase (IU/mL)	0.0358858	0.0211924	0.826787	0.426392	2.32523	0.133088
			0.0350381	0.0206493	0.853914	0.421023	2.39231	0.12998		std. dev.	0.00119882	0.000768047	0.0383624	0.00759256	0.094867	0.00439569
	peak β-D-xylosidase (IU/mL)		0.0220713	0.0161483	0.26335	0.253537	1.32111	0.434635		average peak β-D-xylosidase (IU/mL)	0.0217883	0.0180768	0.279853	0.256933	1.37578	0.440011
			0.0215054	0.0200054	0.296355	0.260328	1.43045	0.445388		std. dev.	0.000400174	0.00272738	0.0233381	0.00480208	0.0773135	0.0076033
	peak α-L-fucosidase (IU/mL)		0.0407355	0.0356033	0.0180842	0.0265612	0.0412546	0.0352489		average peak α-L-fucosidase (IU/mL)	0.0373409	0.0327776	0.019497	0.0231704	0.0437977	0.0379066
			0.0339463	0.029952	0.0209099	0.0197796	0.0463408	0.0405644		std. dev.	0.00480072	0.00399608	0.00199804	0.0047953	0.00359647	0.00375857
	peak β-D-mannosidase (IU/mL)		0.00691184	0.00918964	0.00283046	0.0113026	0.177142	0.314606		average peak β-D-mannosidase (IU/mL)	0.00621645	0.00729309	0.00367959	0.0135632	0.190153	0.332297
			0.00552105	0.00539655	0.00452873	0.0158237	0.203164	0.349989		std. dev.	0.000983436	0.00268212	0.00120086	0.00319687	0.0184	0.0250195
	peak α-L-rhamnosidase (IU/mL)		0.00791184	0.017529	0.0158326	0.0930508	0.0323843	0.0107375		average peak α-L-rhamnosidase (IU/mL)	0.00791184	0.020639	0.0147017	0.0974576	0.0343886	0.0110201
			0.00791184	0.0237489	0.0135708	0.101864	0.036393	0.0113026		std. dev.	1.22663e-17	0.00439818	0.00159934	0.00623213	0.0028346	0.000399608
	peak feruloyl esterase (IU/mL)		0.0556434	0.0296474	0.0935914	0.0461171	0.084473	0.0619921		average peak feruloyl esterase (IU/mL)	0.0508618	0.0254309	0.0895733	0.0439968	0.0980503	0.0669681
			0.0460802	0.0212145	0.0855552	0.0418765	0.111628	0.0719441		std. dev.	0.00676217	0.00596295	0.00568243	0.0029986	0.0192012	0.0070371
	Total mean (IU/mL):		3.58103	1.98528	3.07115	3.38218	8.02386	1.46104
Section 3.3: Statistical calculations for isolate pH and temperature measurements.
1. Temperature stats
Student's t-test (two-tailed):
	SFI-D6									SFI-F16										SFI-D13									BBW2									SFI-F25									SFI-F17
Temp (˚C)	1	10	20	30	40	50	60		Temp (˚C)	1	10	20	30	40	50	60			Temp (˚C)	1	10	20	30	40	50	60		Temp (˚C)	1	10	20	30	40	50	60		Temp (˚C)	1	10	20	30	40	50	60		Temp (˚C)	1	10	20
IU/mL	3.38432	5.3585	5.98763	14.5352	19.4598	5.92255	7.18082		IU/mL	4.23039	4.2087	15.6772	23.8351	24.0964	24.4278	14.0145			IU/mL	5.01139	14.3616	10.1313	23.8204	36.9258	28.5931	6.76863		IU/mL	3.15607	9.97579	15.4449	24.789	46.2339	14.5642	10.2248		IU/mL	4.88122	5.9147	6.57338	10.0011	18.5486	5.27172	4.90292		IU/mL	4.5648	5.36582	5.76498
	2.40807	6.05272	7.57132	12.6261	20.0889	6.8771	9.41534			2.64671	7.96182	16.0546	24.7641	26.1867	31.0229	17.0084				4.03514	9.02484	13.3203	20.0673	37.0735	30.7626	5.83577			4.30177	8.78772	14.9486	24.7786	47.8647	14.9645	11.0463			4.94631	4.94844	7.74487	10.9556	19.6334	6.13949	5.81408			5.57757	5.51242	5.40326
p-value	0.0516212	0.385695	0.0340898	0.0729756	0.00361595	0.312269			p-value	0.372967	0.117715	0.0167447	0.566289	0.573981	0.12468				p-value	0.217472	0.992781	0.0558639	0.0785381	0.0923557	0.0122956			p-value	0.0207256	0.0366943	0.016429	0.0232981	0.0109799	0.0300406			p-value	0.477416	0.155254	0.0516925	0.00738308	0.00332064	0.636667			p-value	0.599155	0.567042	0.675891
	0.0718246									0.0313793										0.11478									0.0134377									0.161499									0.487915
	p>0.05	p>0.05	p<0.05	p>0.05	p<0.05	p>0.05				p>0.05	p>0.05	p<0.05	p>0.05	p>0.05	p>0.05					p>0.05	p>0.05	p>0.05	p>0.05	p>0.05	p<0.05				p<0.05	p<0.05	p<0.05	p<0.05	p<0.05	p<0.05				p>0.05	p>0.05	p>0.05	p<0.05	p<0.05	p>0.05				p>0.05	p>0.05	p>0.05
	H0 is true	H0 is true	H0 is false	H0 is true	H0 is false	H0 is true				H0 is true	H0 is true	H0 is false	H0 is true	H0 is true	H0 is true					H0 is true	H0 is true	H0 is true	H0 is true	H0 is true	H0 is false				H0 is false	H0 is false	H0 is false	H0 is false	H0 is false	H0 is false				H0 is true	H0 is true	H0 is true	H0 is false	H0 is false	H0 is true				H0 is true	H0 is true	H0 is true
										p<0.05
Conclusions SFI-D6:										H0 is false									Conclusions SFI-D13:									Conclusions BBW2:
	between 1-20 degrees, there are no significant differences in activity (p>0.05)																			between 1-20 degrees, there are no significant differences in activity (p>0.05)								There is a statistically significant difference in xylanase activity fbetween all temperatures.																			Conclusion SFI-F17: There is no statistically significant difference in xylanase activity from 1-10, 1-20, 10-20, 20-30 and 50-60 degrees.
	between 10-20 degrees, there are no significant differences in activity (p>0.05)									Conclusions SFI-F16:										between 10-20 degrees, there are no significant differences in activity (p>0.05)																		Conclusions SFI-F25:
	between 20 and 30 degrees, there is a statistically significant difference in activity (p>0.05).										between 1-10 degrees, there is no significant difference in activity (p>0.05)									between 20 and 30 degrees, there are no statistically significant differences in activity (p>0.05).																		There is no statistically significant difference in xylanase activity from 1-10, 1-20, 10-20, 20-30 and 50-60 degrees.
	between 30-40 degrees, there is no statistically signinficant difference in activity (p>0.05).										between 1-20 degrees, there is a significant difference in activity (p<0.05)									between 30-40 degrees, there is a statistically signinficant difference in activity (p<0.05).
	between 40-50 degrees, there is a statistically significant difference in activity (p<0.05).										between 10 and 20 degrees, there is no statistically significant difference in activity (p>0.05).									between 40-50 degrees, there is a statistically significant difference in activity (p<0.05).
	between 50-60 degrees, there is no statistically significant difference in activity (p>0.05).										between 20 and 30 degrees, there is a statistically significant difference in activity (p<0.05).									between 50-60 degrees, there is a statistically significant difference in activity (p<0.05).
											between 30-40 degrees, there is no statistically significant difference in activity (p>0.05).
											between 40-50 degrees, there is no statistically significant difference in activity (p<0.05).
											between 50-60 degrees, there is a statistically significant difference in activity (p>0.05).
2. pH stats
Student's t-test (two-tailed):
	SFI-D6								SFI-F16									SFI-D13									BBW2									SFI-F25									SFI-F17
pH	3	4	5	6	7	8		pH	3	4	5	6	7	8			pH	3	4	5	6	7	8			pH	3	4	5	6	7	8			pH	3	4	5	6	7	8			pH	1.5	2	3	3.5	4
IU/mL	0.0168582	0.0580157	12.5429	4.46844	4.94051	0.160496		IU/mL	0.00420882	2.16169	26.8482	49.9784	32.4254	14.3537			IU/mL	1.07595	12.8321	15.8143	14.5812	6.40595	0.792952			IU/mL	3.21683	10.3632	14.0018	36.0191	13.2067	0.714238			IU/mL	1.18728	1.50496	4.18613	2.38117	1.85985	-0.0241984			IU/mL	1.01	11.3294	11.313	18.5717	17.1127
	0.0234725	0.00248034	14.64	5.37225	5.02117	0.323803			0.00443796	3.45871	29.9611	53.2209	35.668	17.8556				1.64624	13.2174	16.542	16.2388	5.68266	0.918523				3.5819	11.1111	15.2079	33.2485	13.8535	1.76538				1.35356	1.21736	4.68663	2.03505	1.0367	0.0282315				1.5	9.5891	11.6622	18.5014	15.7174
p-value	0.7784	0.0489819	0.0446177	0.915351	0.00230605			p-value	0.1446	0.0184759	0.00931045	0.0166378	0.0175172				p-value	0.00177201	0.0340151	0.51841	0.0289365	0.0388181				p-value	0.0114402	0.0467916	0.0207691	0.0327524	0.00564728				p-value	0.651229	0.0179773	0.0247509	0.287464	0.17525				p-value	0.044877	0.441973	0.0121564	0.201486	0.0280382
																																															0.0745631
	p>0.05	p<0.05	p<0.05	p>0.05	p<0.05				p>0.05	p<0.05	p<0.05	p<0.05	p<0.05					p<0.05	p<0.05	p>0.05	p<0.05	p<0.05					p<0.05	p<0.05	p<0.05	p<0.05	p<0.05					p>0.05	p<0.05	p<0.05	p>0.05	p>0.05					p<0.05	p>0.05	p>0.05	p>0.05	p<0.05
	H0 is true	H0 is false	H0 is false	H0 is true	H0 is false				H0 is true	H0 is false	H0 is false	H0 is false	H0 is false					H0 is false	H0 is false	H0 is true	H0 is false	H0 is false					H0 is false	H0 is false	H0 is false	H0 is false	H0 is false					H0 is true	H0 is false	H0 is false	H0 is true	H0 is true					H0 is false	H0 is true	H0 is true	H0 is true	H0 is false
Conclusions SFI-D6:									Conclusions SFI-F16:								Conclusions SFI-D13:									Conclusions BBW2:										Conclusions SFI-F25:									Conclusion SFI-F17:
	between pH 6-7 there are no significant differences in activity (p>0.05)									between pH 3-4, there are no significant differences in activity (p>0.05)								between pH 3-4, there are significant differences in activity (p<0.05)									between pH 3-4, there are significant differences in activity (p<0.05)										between pH 3-4, there are no significant differences in activity (p>0.05)									between pH 1.5-2, there are significant differences in activity (p<0.05)
	between pH 4-5, 5-6 and 7-8 there is a significant difference in activity (p<0.05)									between pH 4-5, there are significant differences in activity (p<0.05)								between pH 4-5, there are significant differences in activity (p<0.05)									between pH 4-5, there are significant differences in activity (p<0.05)										between pH 4-5, there are significant differences in activity (p<0.05)									between pH 2-3, there are no significant differences in activity (p>0.05)
										between pH 5-6, there is a statistically significant difference in activity (p<0.05).								between pH 5-6, there is no statistically significant difference in activity (p>0.05).									between pH 5-6, there is a statistically significant difference in activity (p<0.05).										between pH 5-6, there is a statistically significant difference in activity (p<0.05).									between pH 3-3.5, there are significant differences in activity (p<0.05)
										between pH 6-7, there is a statistically significant difference in activity (p<0.05).								between pH 6-7, there is a statistically significant difference in activity (p<0.05).									between pH 6-7, there is a statistically significant difference in activity (p<0.05).										between pH 6-7, there is no statistically signinficant difference in activity (p>0.05).									between pH 3-4, there are no significant differences in activity (p>0.05)
										between pH 7-8, there is a statistically significant difference in activity (p<0.05).								between pH 7-8, there is a statistically significant difference in activity (p<0.05).									between pH 7-8, there is a statistically significant difference in activity (p<0.05).										between pH 7-8, there is no statistically significant difference in activity (p>0.05).									between pH 3.5-4, there are no significant differences in activity (p>0.05)
																																														between pH 4-5, there are significant differences in activity (p<0.05)
																																														between pH 5-6, there is a statistically significant difference in activity (p<0.05).
																																														between pH 6-7, there is no statistically signinficant difference in activity (p>0.05).
																																														between pH 7-8, there is no statistically significant difference in activity (p>0.05).
[truncated: 4 more columns]
